# Supplementary material for: N-Hydroxyphthalimide catalysts as bioactive pro-oxidants
Source: Royal Society of Chemistry journal article supplement (doi:10.1039/c5ra26556h), 2016-01-01
Supplement: c5ra26556h1.pdf [file c5ra26556h1.pdf]

## Supplementary Information

### ***N*-Hydroxyphthalimide Catalysts as Bioactive Pro-Oxidants**

Lucio Melone,<sup>a,b</sup> Paolo Tarsini,<sup>a</sup> Gabriele Candiani,<sup>a,\*</sup> and Carlo Punta.<sup>a,\*</sup>

a Department of Chemistry, Materials, and Chemical Engineering “Giulio Natta”. Politecnico di Milano, Piazza L. Da Vinci 32, 20133 Milano – Italy and INSTM local unit. Email: (G.C.) gabriele.candiani@polimi.it; (C.P.) carlo.punta@polimi.it.

b Università degli Studi e-Campus, Via Isimbardi 10, 22060 Novedrate, Como – Italy.

#### **Table of Content:**

|                   |                    |
|-------------------|--------------------|
| NMR spectra.....  | <b>SI 1-SI 7</b>   |
| Cytotoxicity..... | <b>SI 8</b>        |
| GSH content.....  | <b>SI 9</b>        |
| DLS analyses..... | <b>SI 10-SI 15</b> |

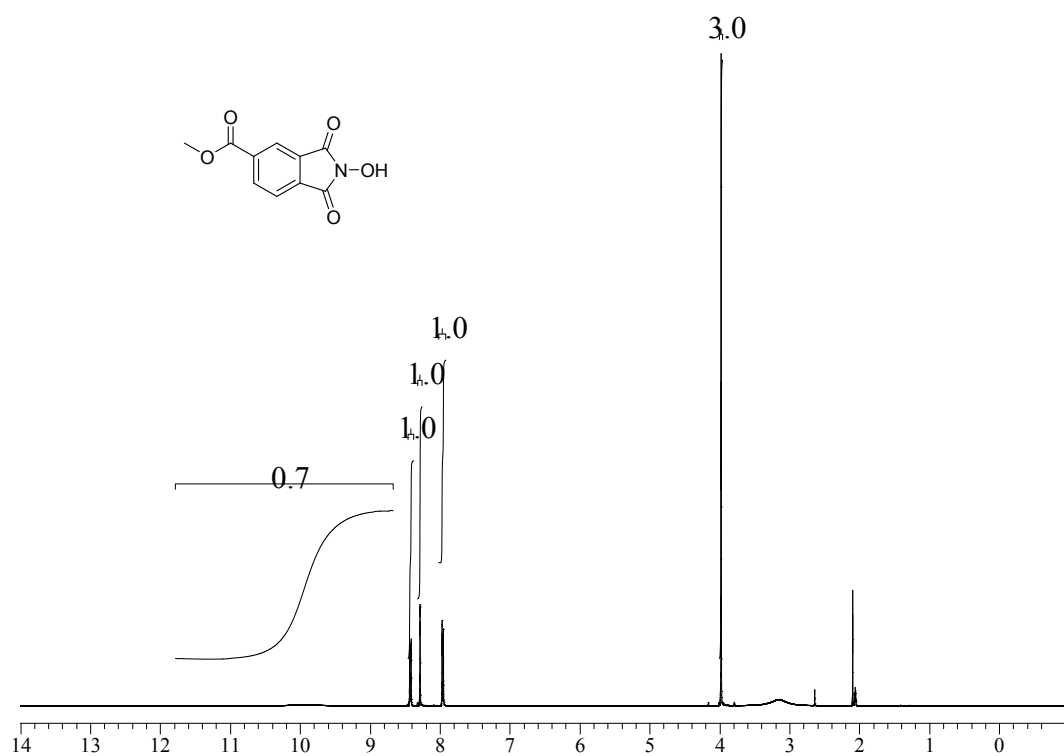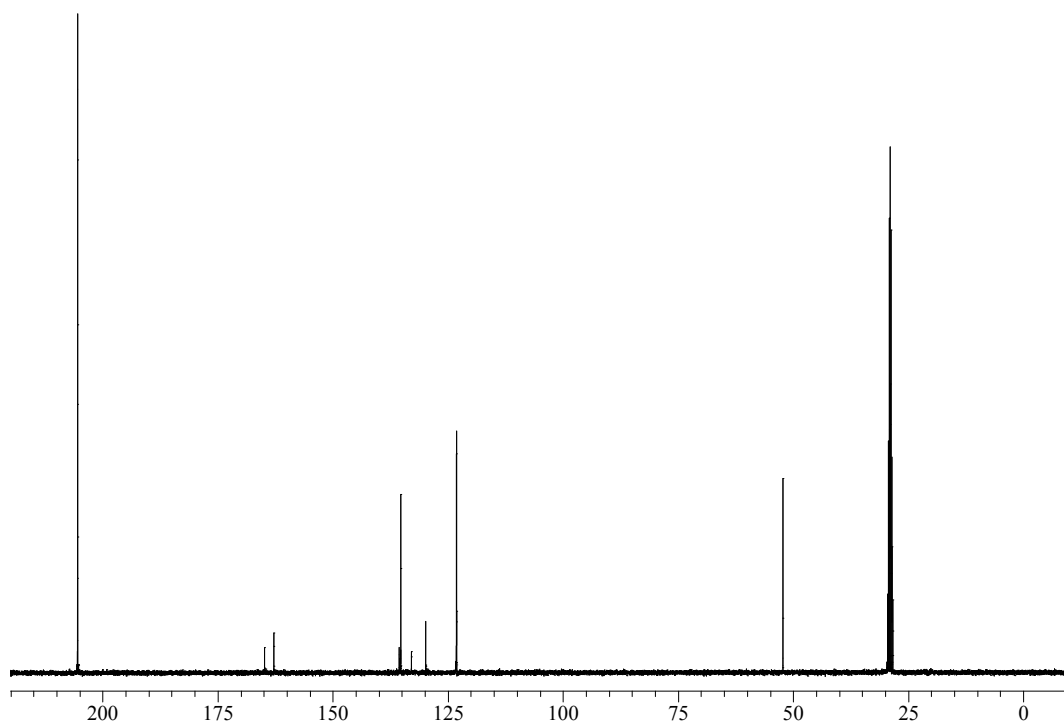

Figure SI 1.  $^1\text{H-NMR}$  and  $^{13}\text{C-NMR}$  spectra of compound 1-OH. Solvent: acetone- $\text{d}_6$ .

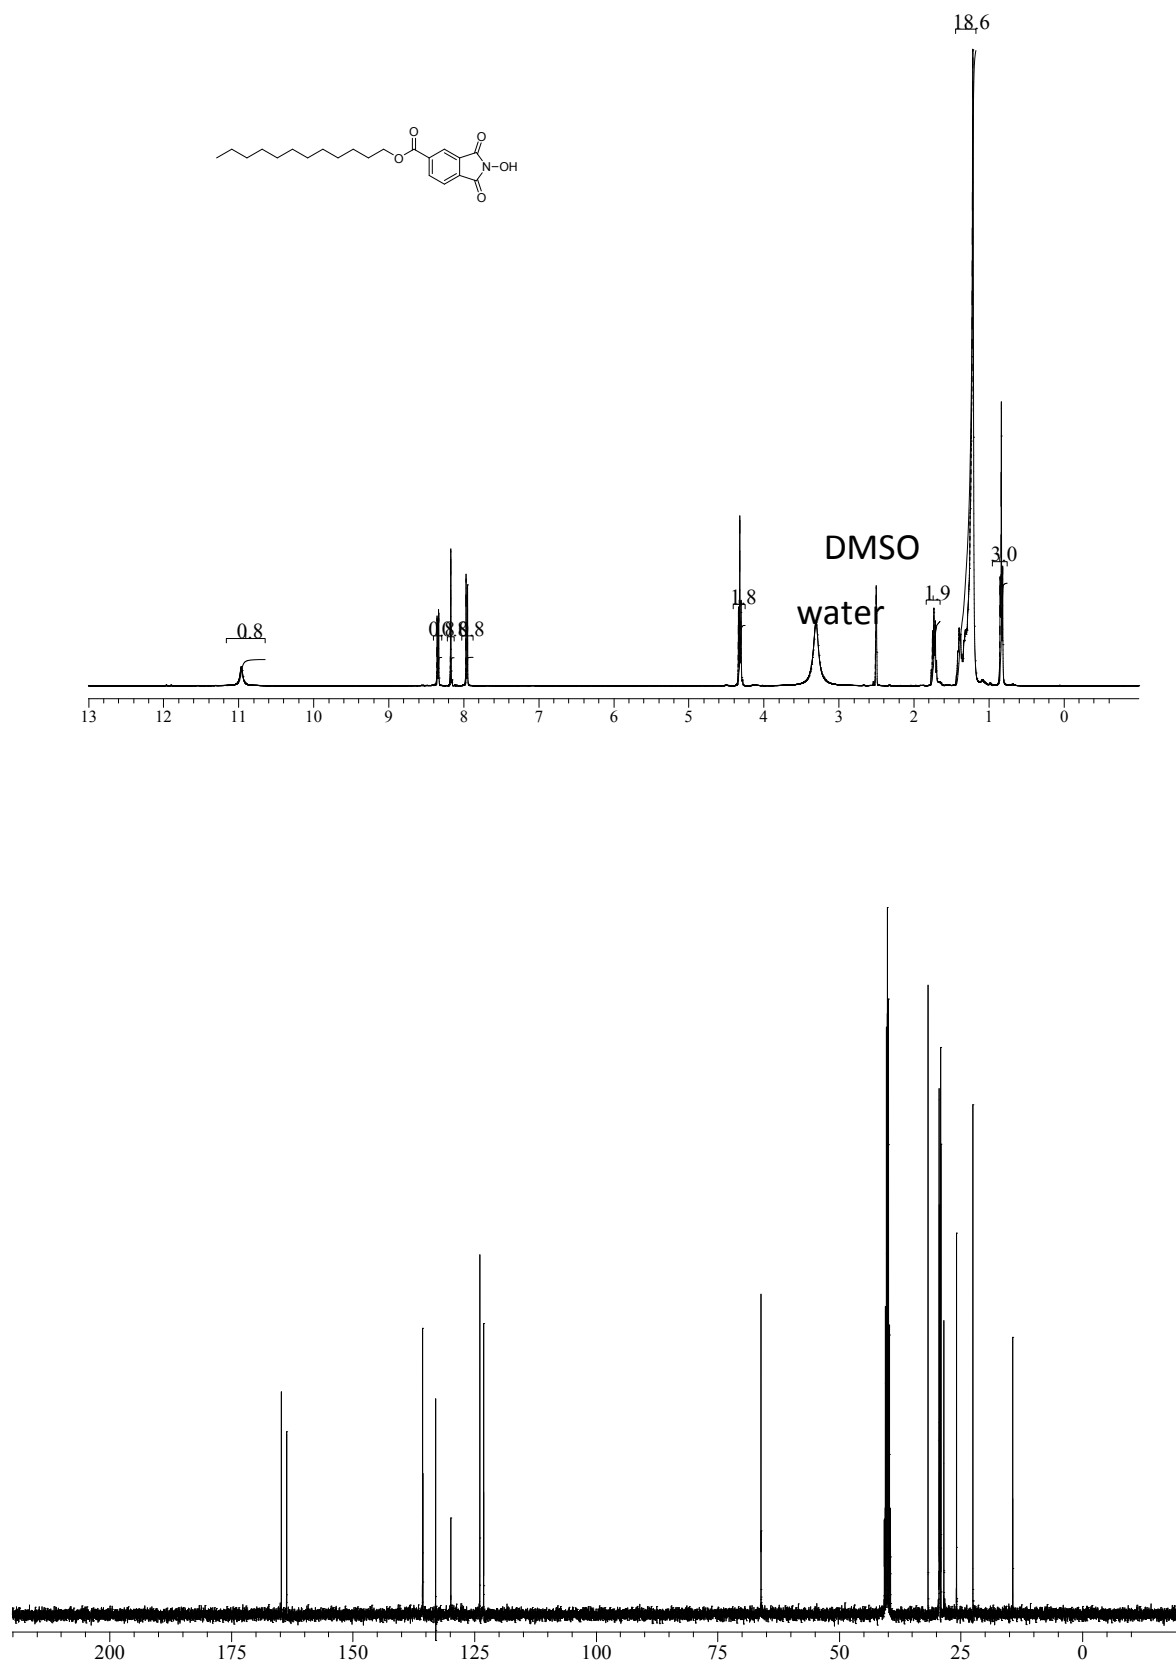

Figure SI 2.  $^1\text{H}$ -NMR and  $^{13}\text{C}$ -NMR spectrum of compound 2-OH. Solvent: DMSO- $d_6$ .

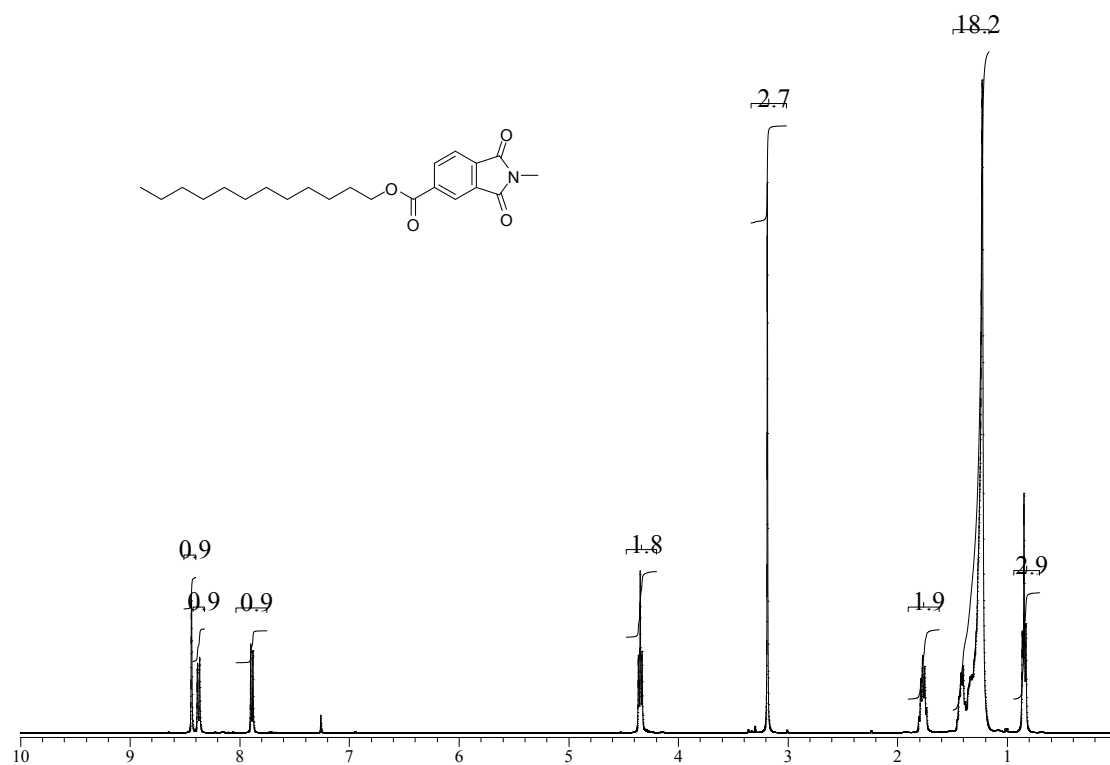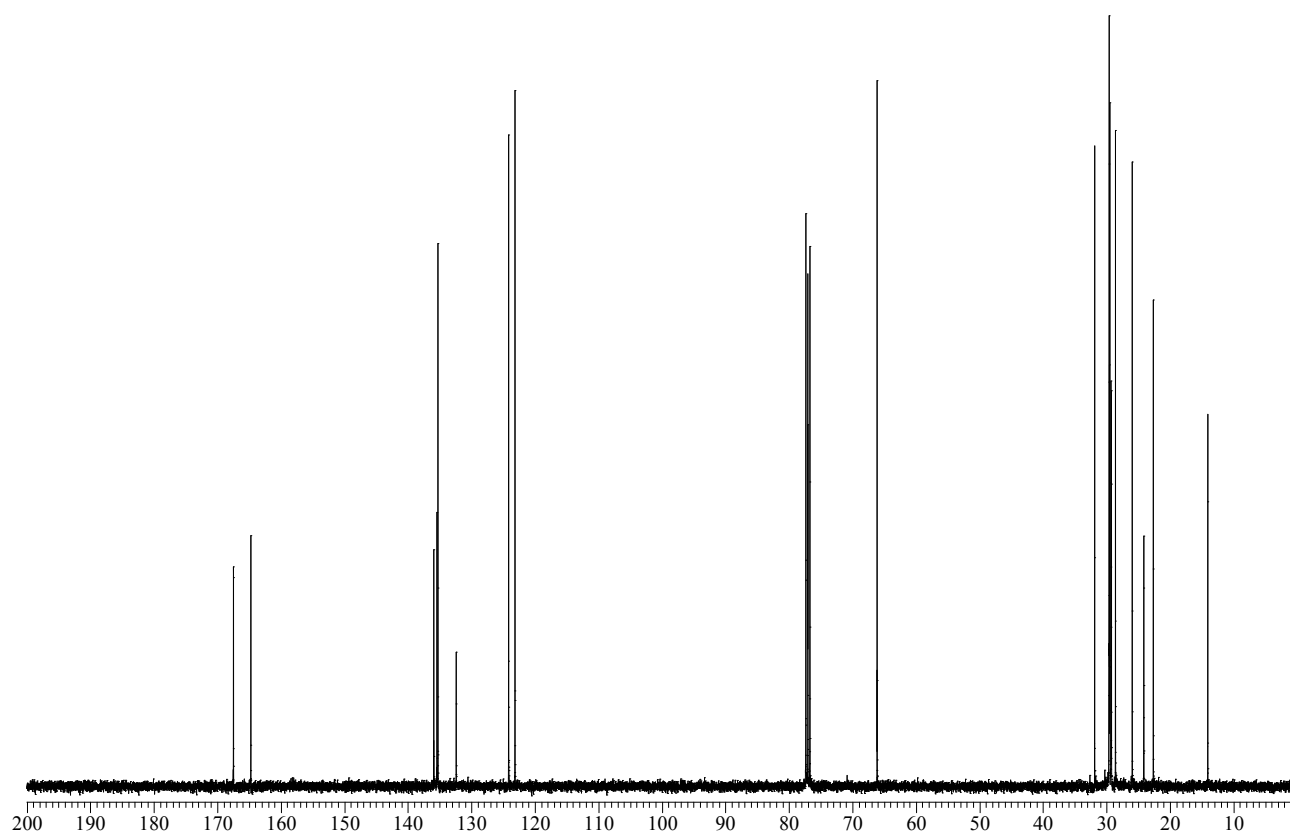

Figure SI 3.  $^1\text{H}$ -NMR and  $^{13}\text{C}$ -NMR spectrum of compound 2-Me. Solvent:  $\text{CDCl}_3$ .

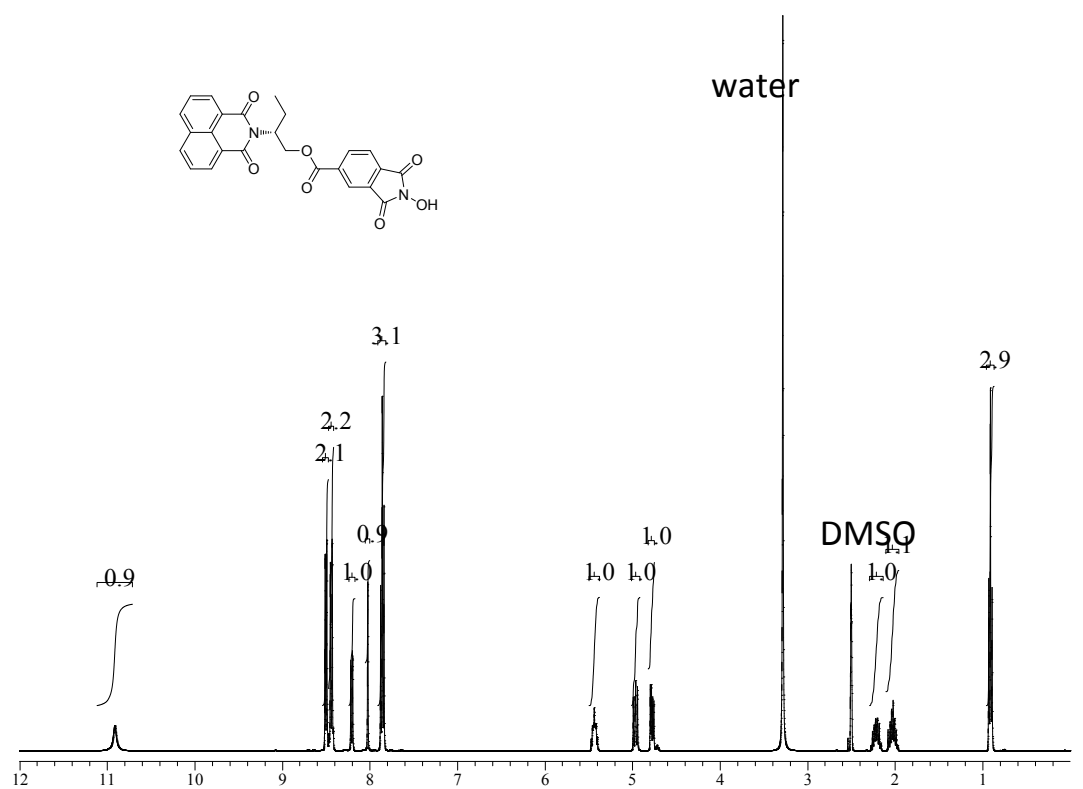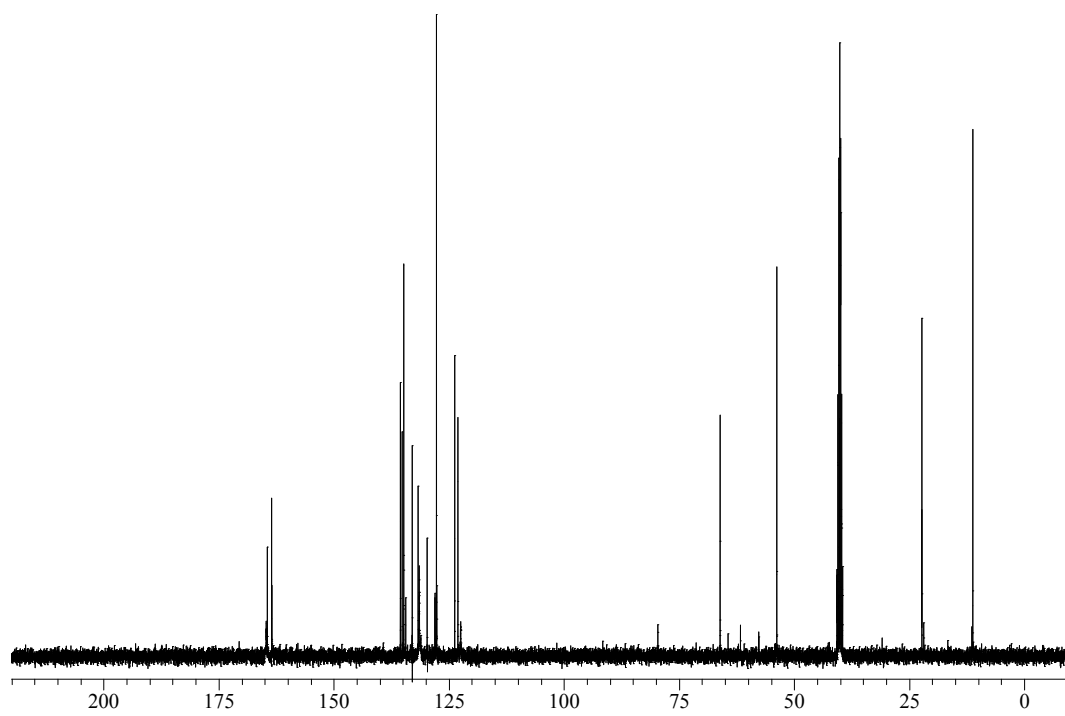

**Figure SI 4.** <sup>1</sup>H-NMR and <sup>13</sup>C-NMR spectrum of compound 3-OH. Solvent: DMSO-d<sub>6</sub>.

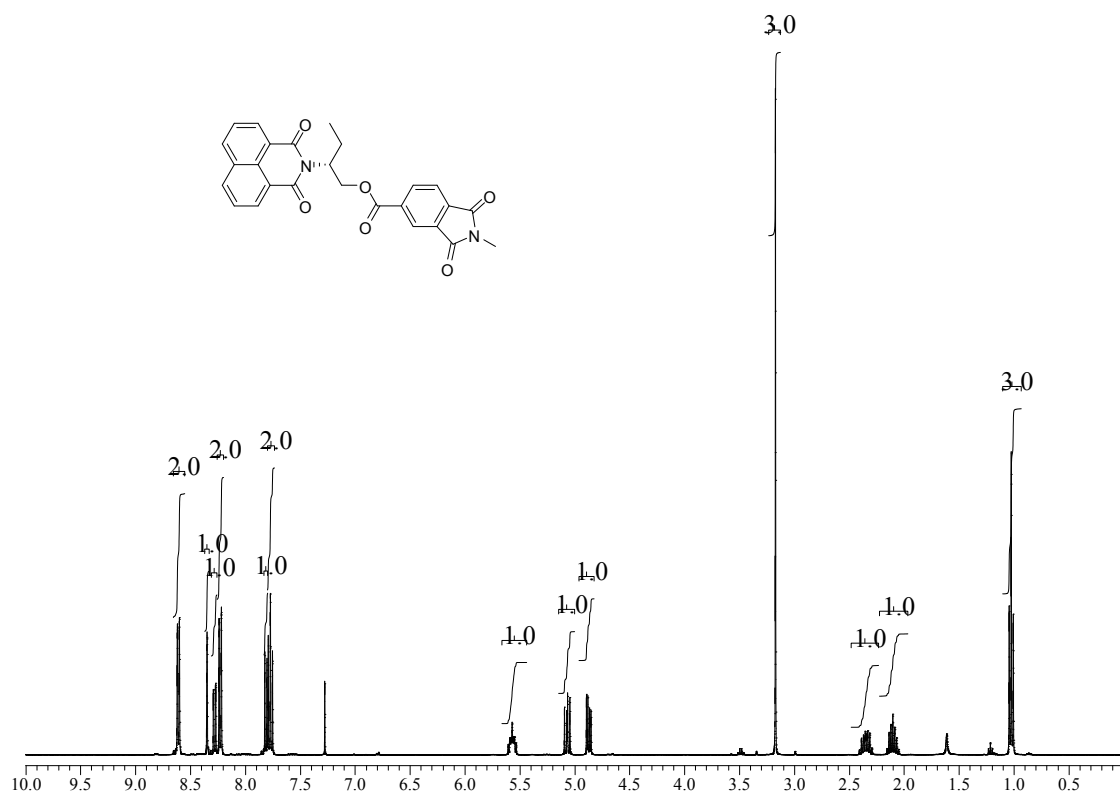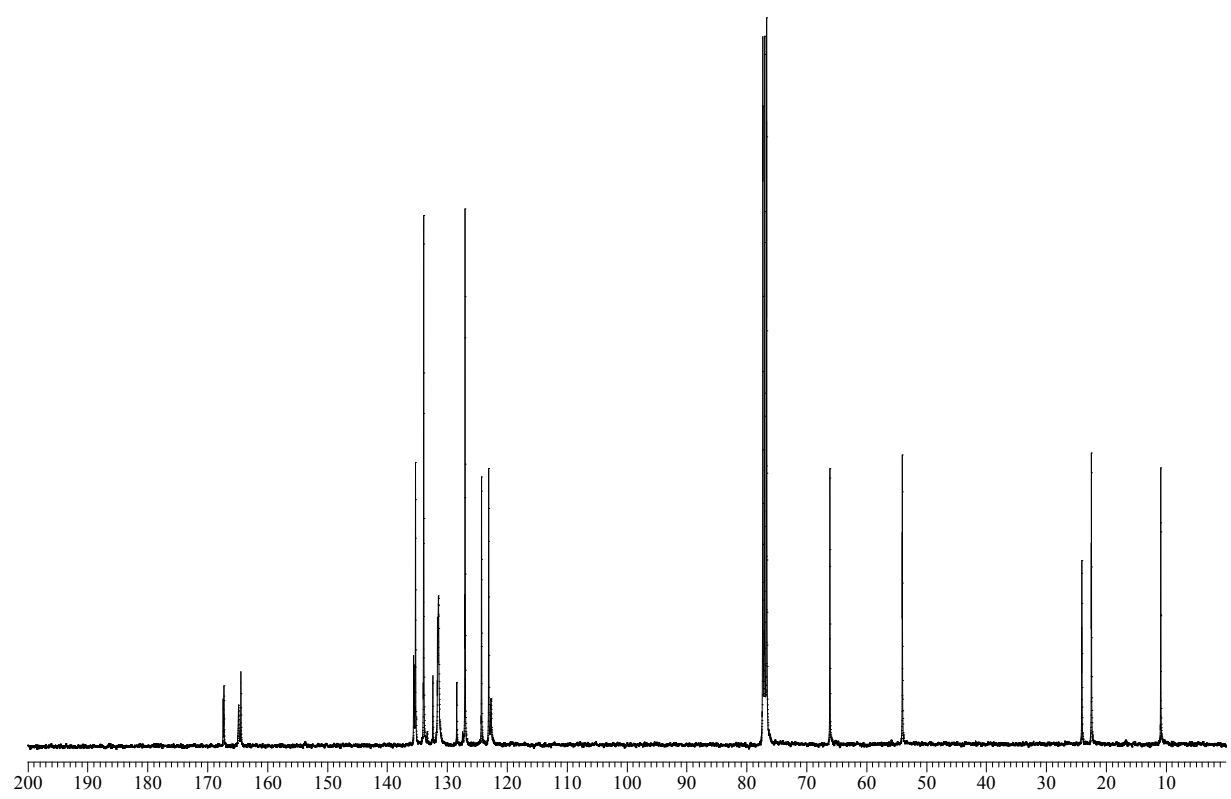

Figure SI 5.  $^1\text{H}$ -NMR and  $^{13}\text{C}$ -NMR spectrum of compound 3-Me. Solvent:  $\text{CDCl}_3$ .



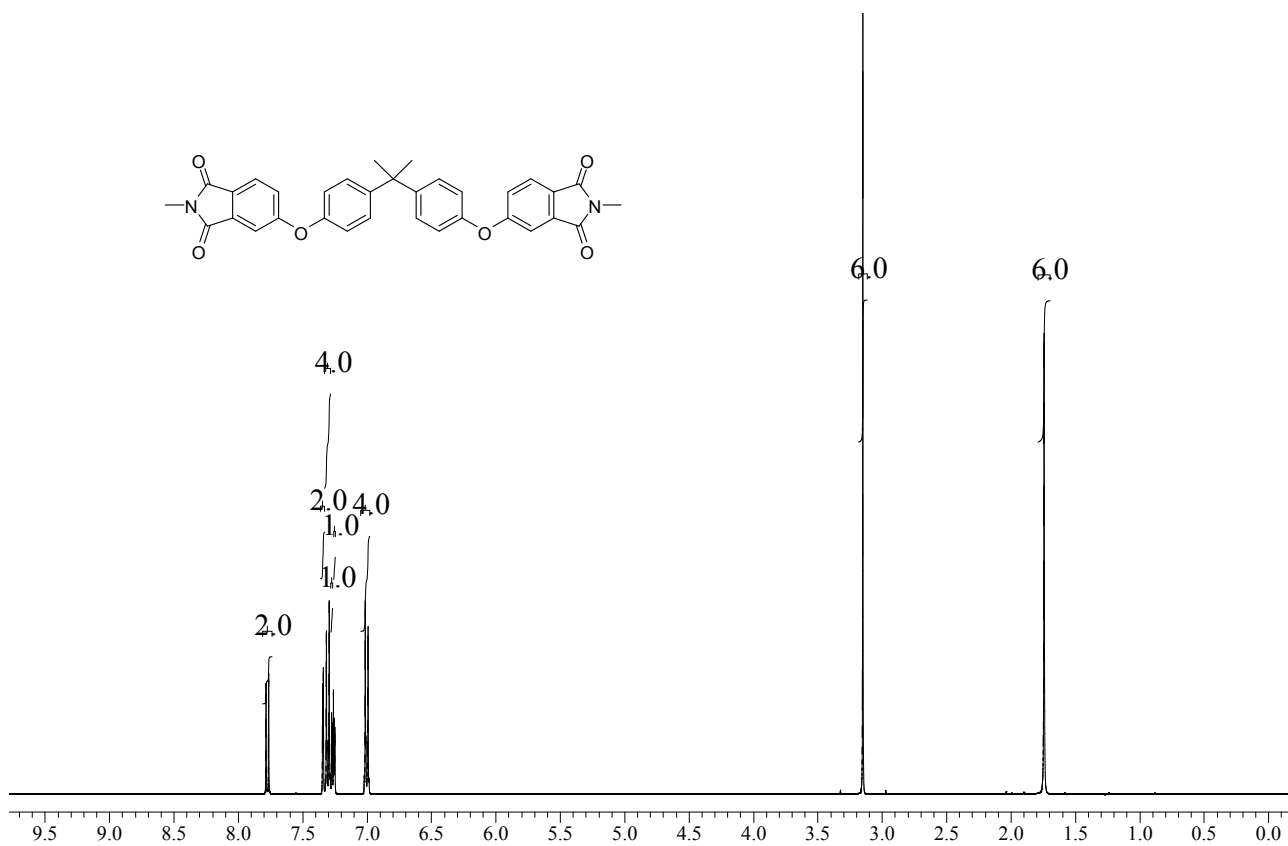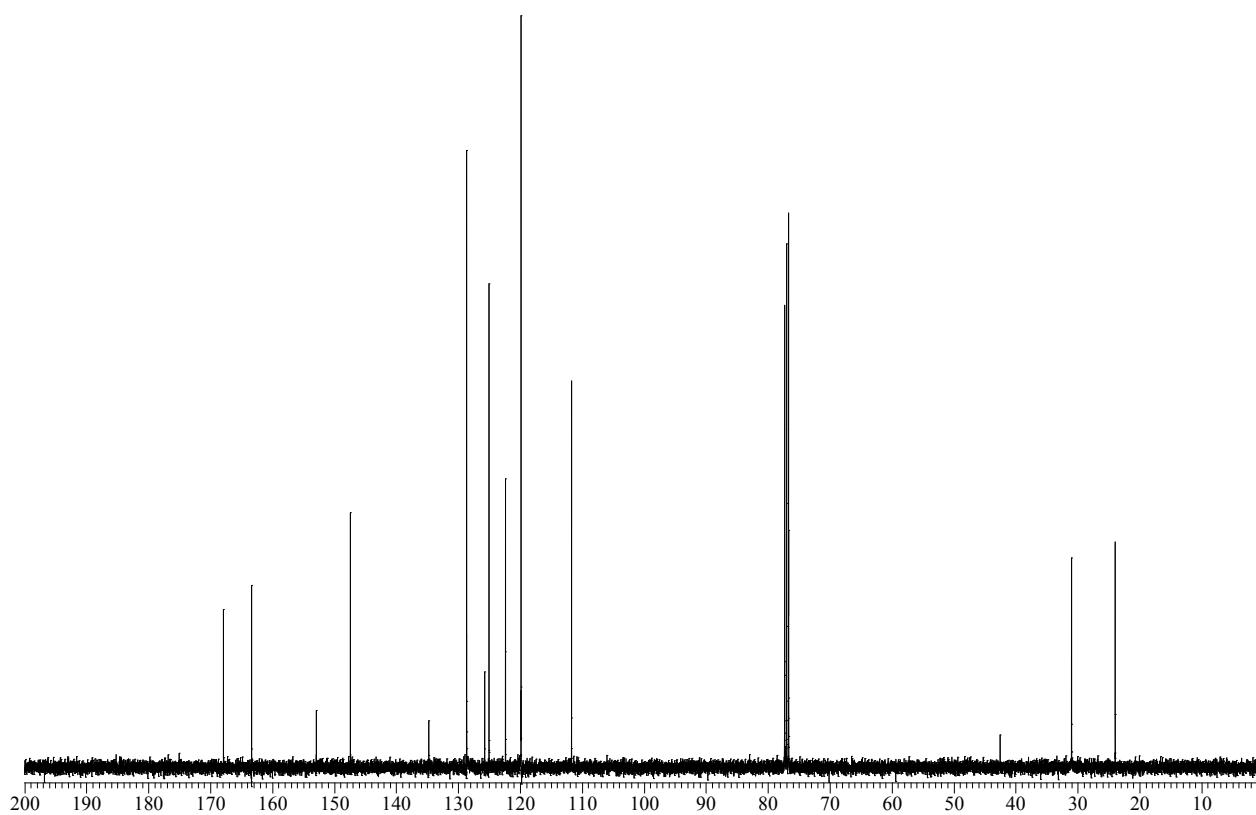

**Figure SI 7.** <sup>1</sup>H-NMR and <sup>13</sup>C-NMR spectrum of compound 4-Me. Solvent: CDCl<sub>3</sub>.



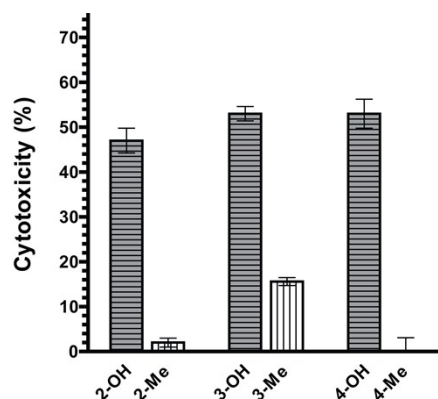

**Figure SI 8.** Cytotoxicity of **2-OH**, **3-OH**, and **4-OH** (each at its EC50 that were 100  $\mu$ M, 200  $\mu$ M, and 110  $\mu$ M, respectively) in MG-63 cells, each compared with the respective -Me derivative tested at the same concentration.

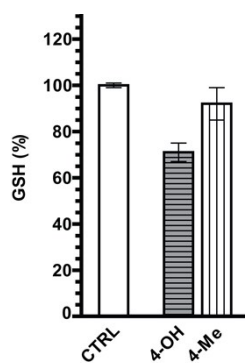

**Figure SI 9.** GSH content in MG-63 cells treated with **4-OH** and **4-Me** compounds vs. untreated control cells (CTRL).

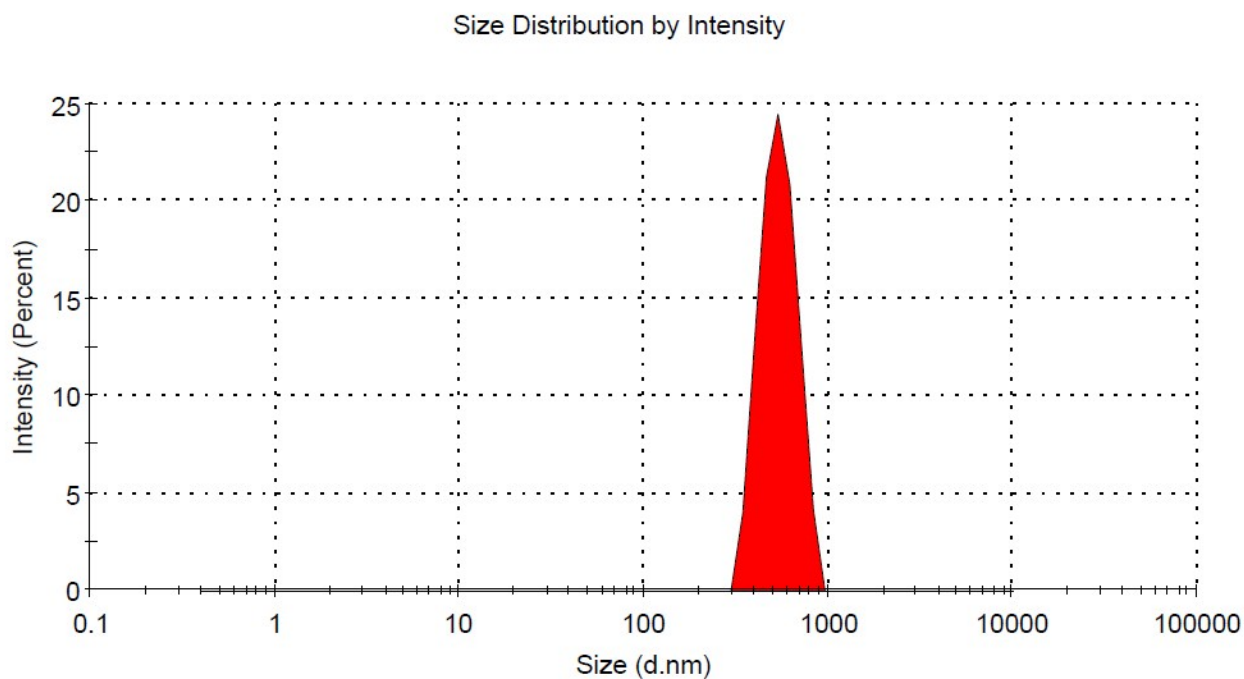

**Figure SI 10.** Dynamic Light Scattering (DLS) analysis of the hydrodynamic diameter of **2-OH**-aggregates in water.

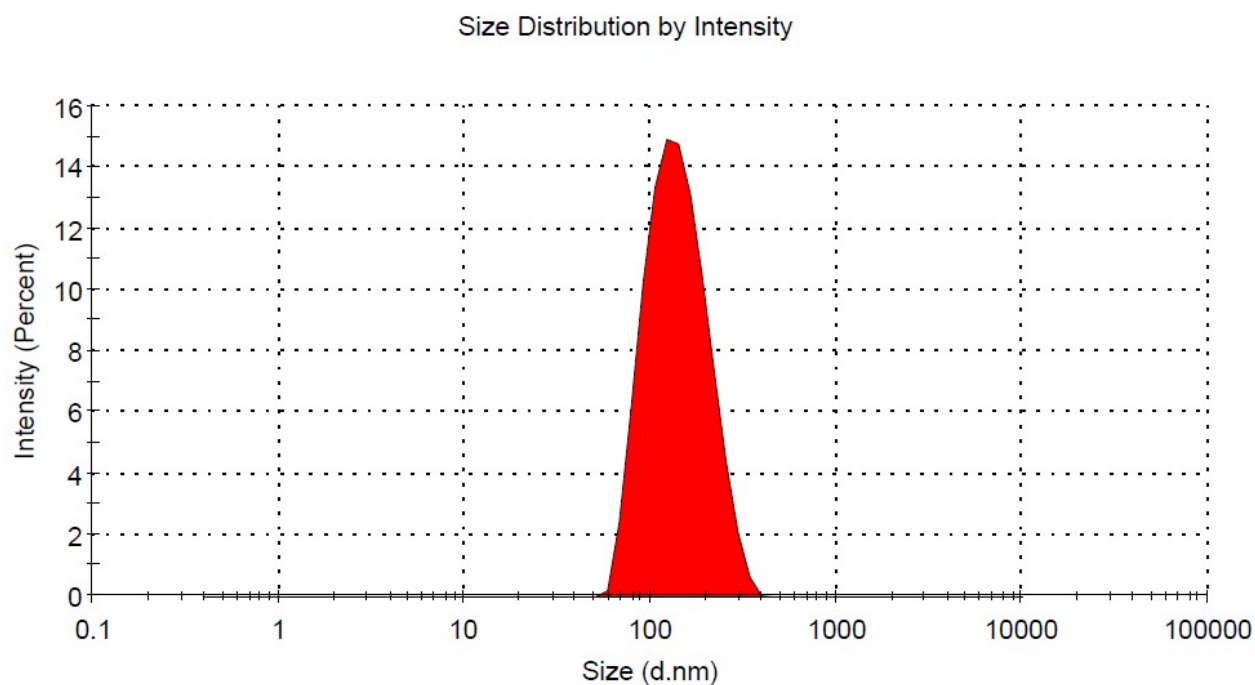

**Figure SI 11.** Dynamic Light Scattering (DLS) analysis of the hydrodynamic diameter of **3-OH**-aggregates in water.

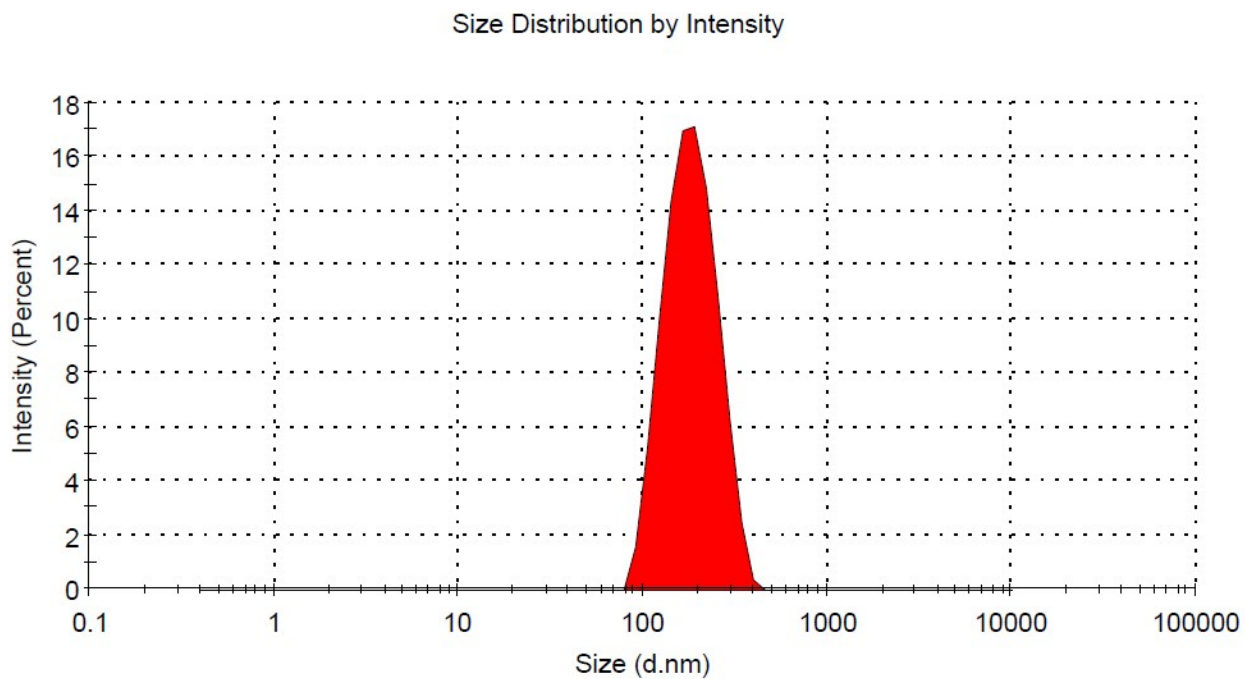

**Figure SI 12.** Dynamic Light Scattering (DLS) analysis of the hydrodynamic diameter of **4-OH**-aggregates in water.

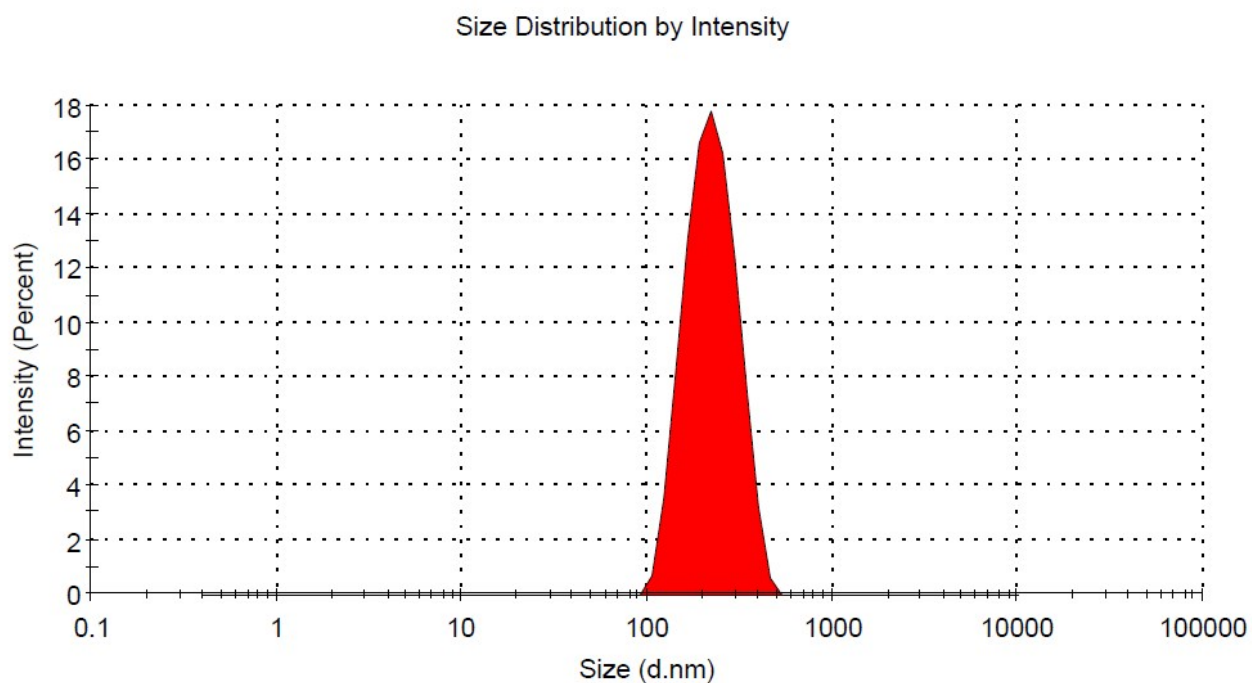

**Figure SI 13.** Dynamic Light Scattering (DLS) analysis of the hydrodynamic diameter of **2-Me**-aggregates in water.

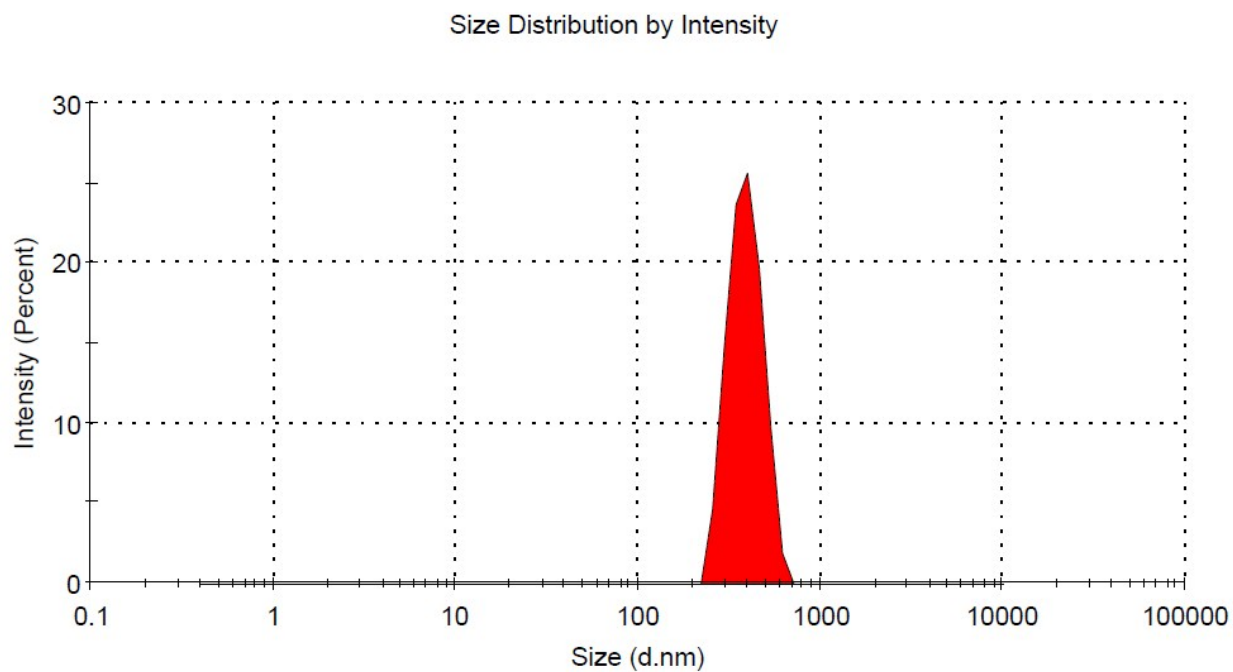

**Figure SI 14.** Dynamic Light Scattering (DLS) analysis of the hydrodynamic diameter of **3-Me**-aggregates in water.

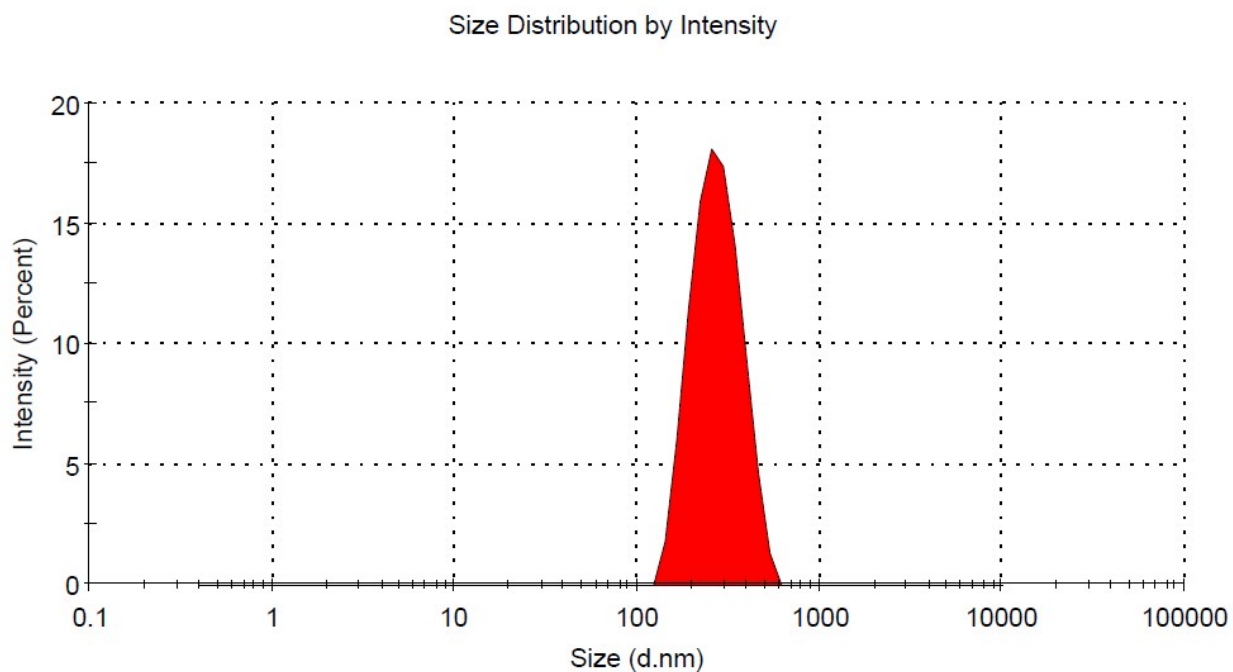

**Figure SI 15.** Dynamic Light Scattering (DLS) analysis of the hydrodynamic diameter of **4-Me**-aggregates in water.
